# Supplementary material
Source: PubMed Central journal article supplement (PMC8727581)
Supplement: 41433_2021_1470_MOESM1_ESM.pdf [file 41433_2021_1470_MOESM1_ESM.pdf]

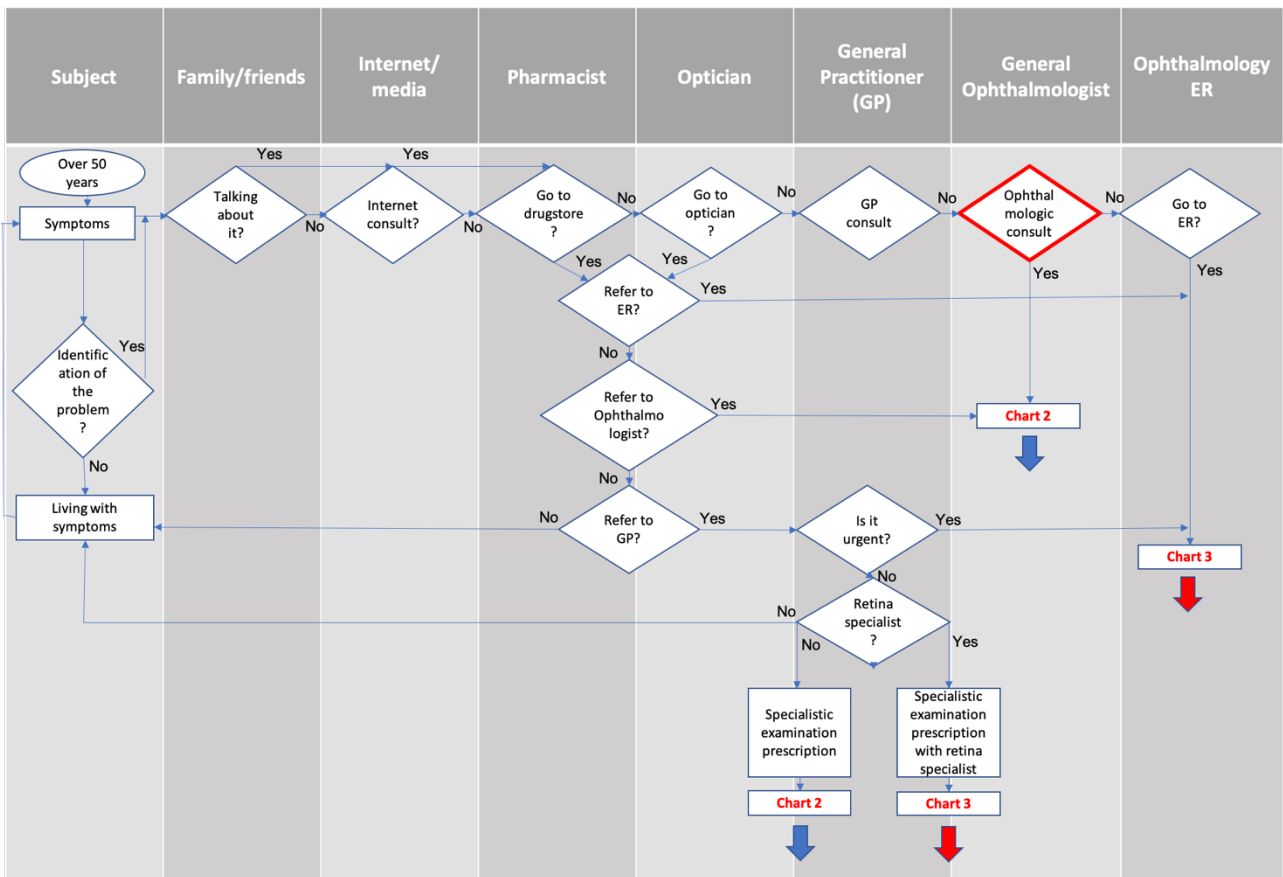

**Supplementary information 1:** The journey map developed by the experts consensus, focused on the research of the correct healthcare facility: “From symptoms to access to care”. The boxes lined in red highlight the areas where a discrepancy between the map and patients’ narratives was perceived.
