# Supplementary material
Source: PubMed Central journal article supplement (PMC8727581)
Supplement: 41433_2021_1470_MOESM2_ESM.pdf [file 41433_2021_1470_MOESM2_ESM.pdf]

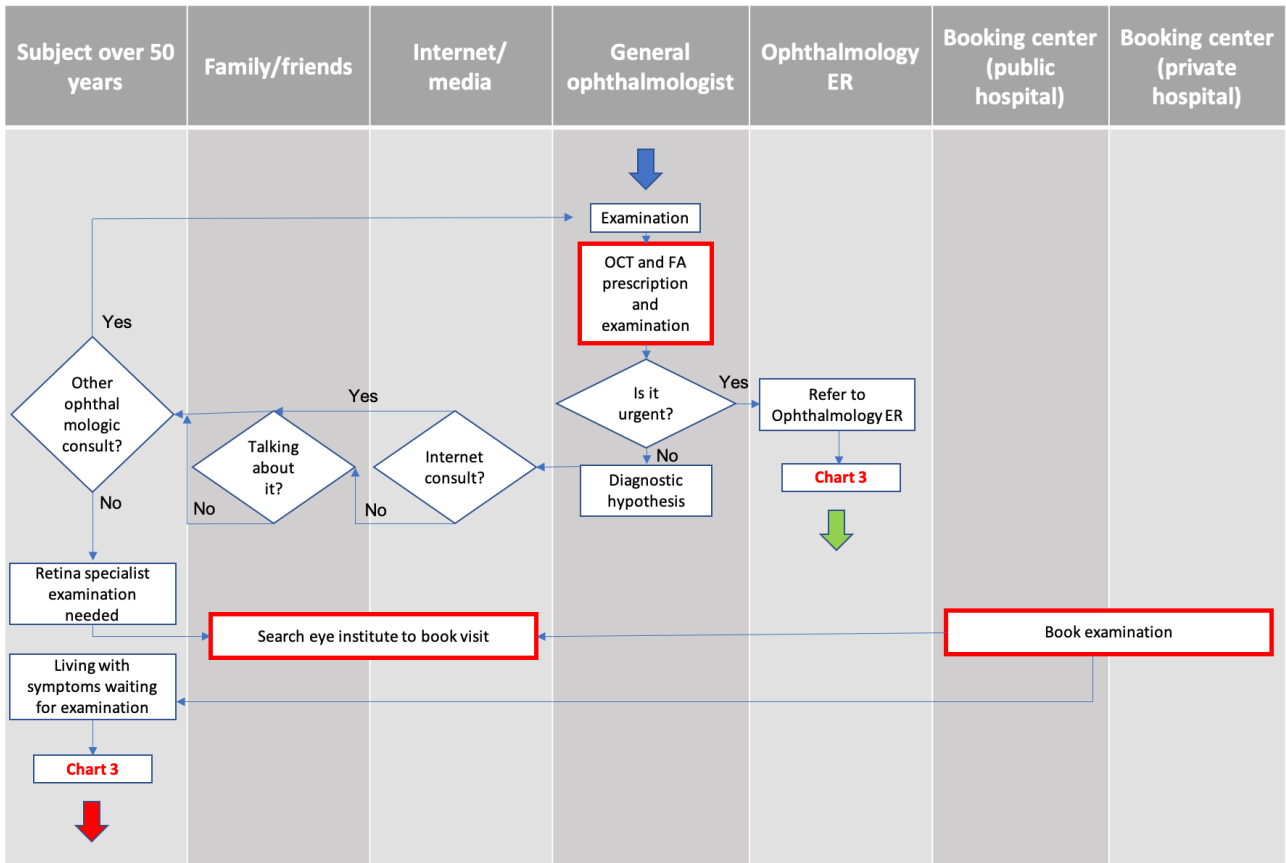

**Supplementary information 2:** The journey map developed by the experts consensus, focused on the process of obtaining the specialist consultations: “Search for a diagnosis”. The boxes lined in red highlight the areas where a discrepancy between the map and patients’ narratives was perceived.
