# Supplementary material
Source: PubMed Central journal article supplement (PMC8727581)
Supplement: 41433_2021_1470_MOESM4_ESM.pdf [file 41433_2021_1470_MOESM4_ESM.pdf]

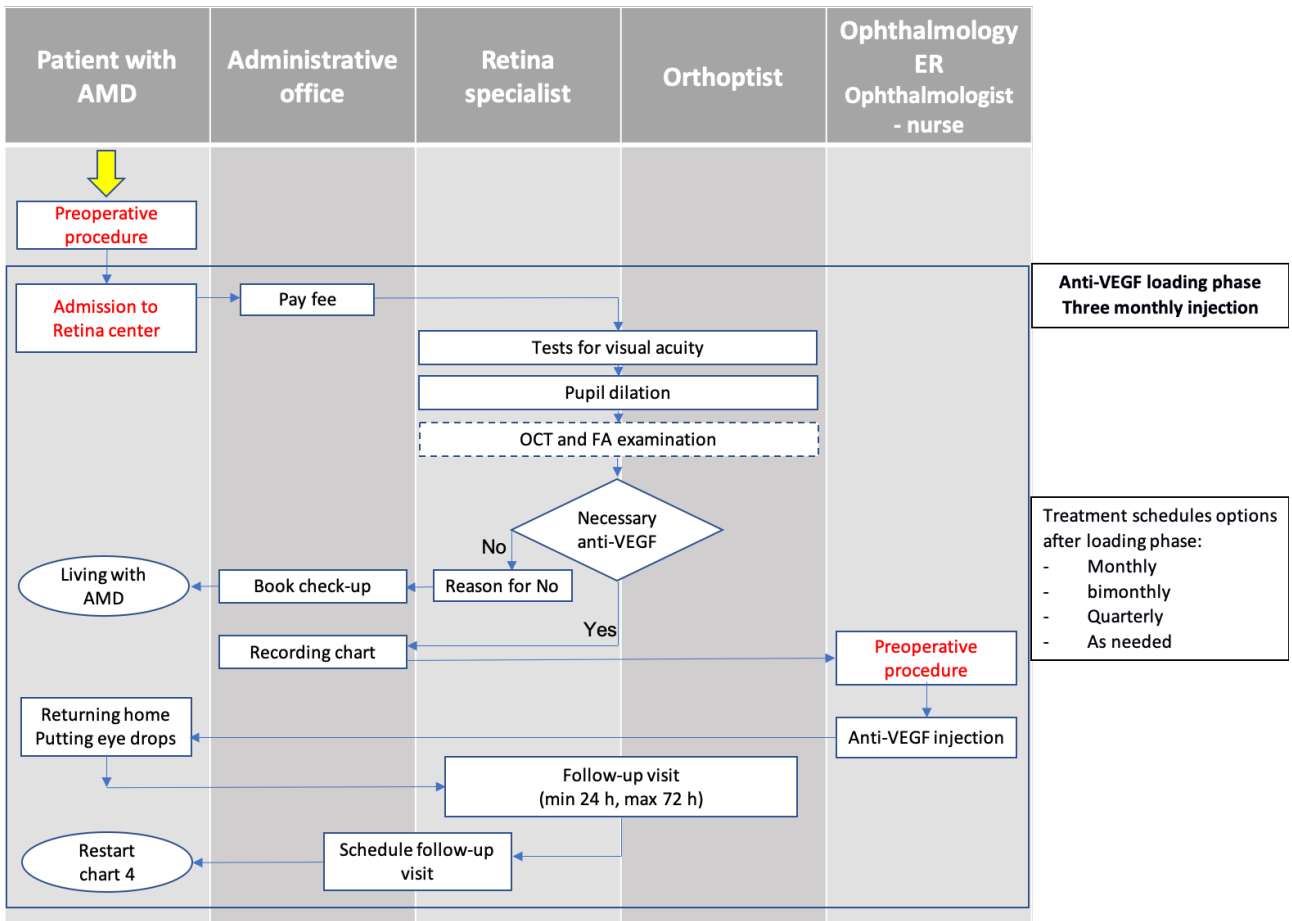

**Supplementary information 4:** The journey map developed by the experts consensus, focused on the treatment experience.
